# Supplementary material for: Formation of C60 fullerene-bonded-CNTs using radio frequency plasma
Source: Royal Society of Chemistry journal article supplement (doi:10.1039/c7ra01530e), 2017-01-01
Supplement: c7ra01530e1.pdf [file c7ra01530e1.pdf]

## SUPPORTING INFORMATION

### Formation of C<sub>60</sub> fullerene-bonded-CNTs by radio frequency plasma

Shengxia Duan,<sup>a,b</sup> Xia Liu,<sup>a,b</sup> Yanan Wang,<sup>a,b</sup> Dadong Shao,<sup>a</sup> Yuedong Meng,<sup>a</sup> Tawwar Hayat,<sup>d,e</sup>  
Ahmed Alsaedi,<sup>d</sup> Jiaxing Li,<sup>a,c,d\*</sup>

<sup>a</sup>Institute of Plasma Physics, Chinese Academy of Sciences, P.O. Box 1126, Hefei 230031, P.R. China. Email: lijx@ipp.ac.cn, Tel: +8665596617.

<sup>b</sup>University of Science and Technology of China, Hefei, 230026, P.R. China.

<sup>c</sup>Collaborative Innovation Center of Radiation Medicine of Jiangsu Higher Education Institutions, P.R. China.

<sup>d</sup>NAAM Research Group, King Abdulaziz University, Jeddah, 21589, Saudi Arabia.

<sup>e</sup>Department of Mathematics, Quaid-I-Azam University, Islamabad 44000, Pakistan.

#### Corresponding authors:

Jiaxing Li

E-mail: lijx@ipp.ac.cn

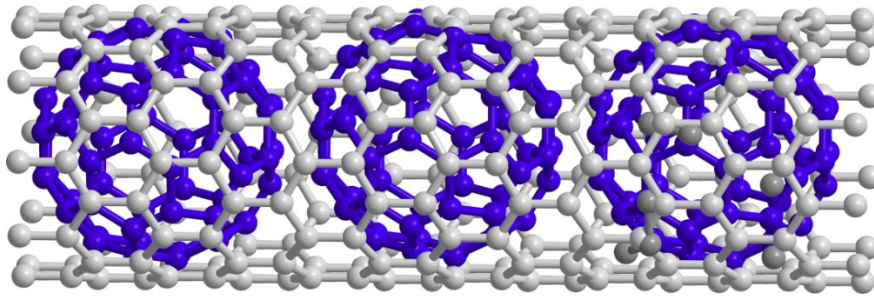

**Fig. S1** Schematic representation of carbon nano-peapod.

**Description of CVD method for the synthesis of CNBs structure.**

A schematic presentation of CVD method is given as follows.<sup>1</sup> Typically, catalyst particles were grown in situ *via* ferrocene vapor decomposition (Scheme S1). The precursor was vaporized by passing ambient temperature CO (with a flow rate of 300 cm<sup>3</sup>·min<sup>-1</sup>) through a cartridge filled with ferrocene powder. The partial vapor pressure of ferrocene in the reactor was maintained at 0.7 Pa. The flow containing ferrocene vapor was then introduced into the high temperature zone of the ceramic tube reactor through a water-cooled probe and mixed with additional CO (100 cm<sup>3</sup>·min<sup>-1</sup>). The reactor wall temperature was varied from 800 to 1150 °C. Meanwhile, controlled amounts of H<sub>2</sub>O and CO<sub>2</sub> were also added together with the carbon source *via* a mass flow controller to alter the density of fullerenes on the CNTs. In order to introduce the H<sub>2</sub>O vapor, a flow of a carrier gas was passed through a water saturation vessel. The amount of H<sub>2</sub>O was varied from 0 to 405 ppm. The concentration of introduced CO<sub>2</sub> was varied from 0 to 12000 ppm. The carrier gas water vapor saturation conditions were monitored on-line by a Gaset Fourier-transform infrared (FT-IR) spectrometer. And nano-buds were collected downstream of the reactor either by filtering on silver or nitrocellulose disk filters or by depositing on TEM grids via an electrostatic precipitator (ESP).

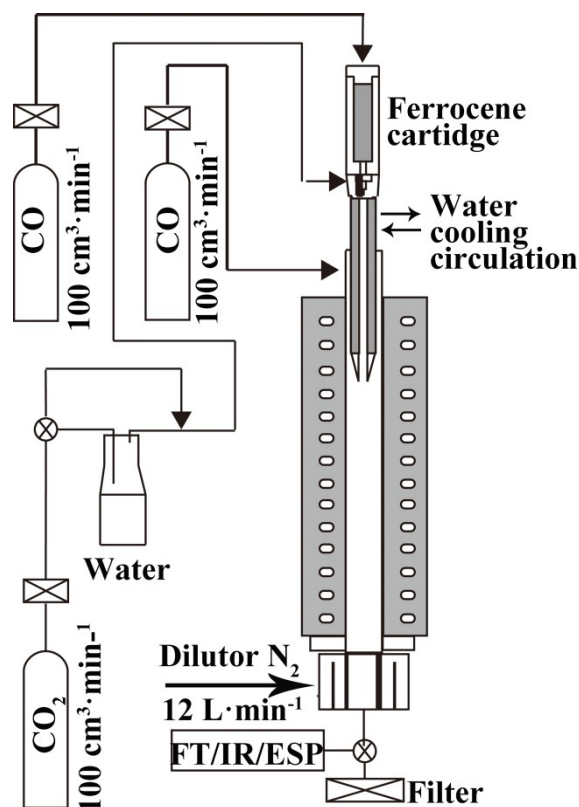

**Scheme S1** Schematic presentation of the experimental setup for the preparation of CNBs.

### **Materials and characterization of the CNBs structure.**

Both CNTs and C<sub>60</sub> fullerenes were purchased from Alfa Aesar. The materials were treated with hydrochloric acid (HCl) to remove the metal catalysts before radio frequency plasma (RF plasma) treatment. High-resolution transmission electron microscopy (HRTEM) photographs were taken on a high-resolution transmission electron microscope (HRTEM, Tecnai Model JEOL-2010) at an accelerating voltage of 200 kV. The Raman spectra were recorded at ambient temperature on a SPEX 1403 spectrometer with an argon-ion laser at excitation energy of 2.33 eV.

### **Detailed synthesis of CNBs.**

In a typical method, CNTs was firstly mixed with C<sub>60</sub> fullerenes by grinding with their mass ratio of 1:1 using a mortar. Secondly, the whole mixture was transferred to a glass flask and the HV pulsed dc power with 100 W was applied to the plasma coil until N<sub>2</sub> vacuum degree of the glass flask reached a relative stable state about 3.9 Pa. The whole mixture was then treated under this condition for about 1 hour. Subsequently, 20 mL carbon disulphide (CS<sub>2</sub>) was injected into the glass flask, which

was then continuously stirred for about 24 h under ambient temperature. In the end, the sample was collected and washed several times with  $\text{CS}_2$  to remove the unreacted  $\text{C}_{60}$ . With no extra post-synthetic process, the purified sample was dried in a vacuum oven at  $60^\circ\text{C}$  for 12 hours, some of which was dispersed in  $\text{CS}_2$  and sonicated before transferring onto TEM grids. And the schematic and specific experimental setups were shown in Fig. S2 and Fig. S3, respectively.

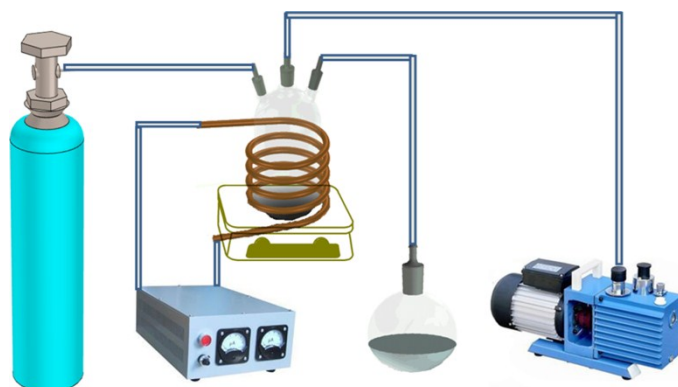

**Fig. S2** Schematic view of the experiment setup for the synthesis of CNBs.

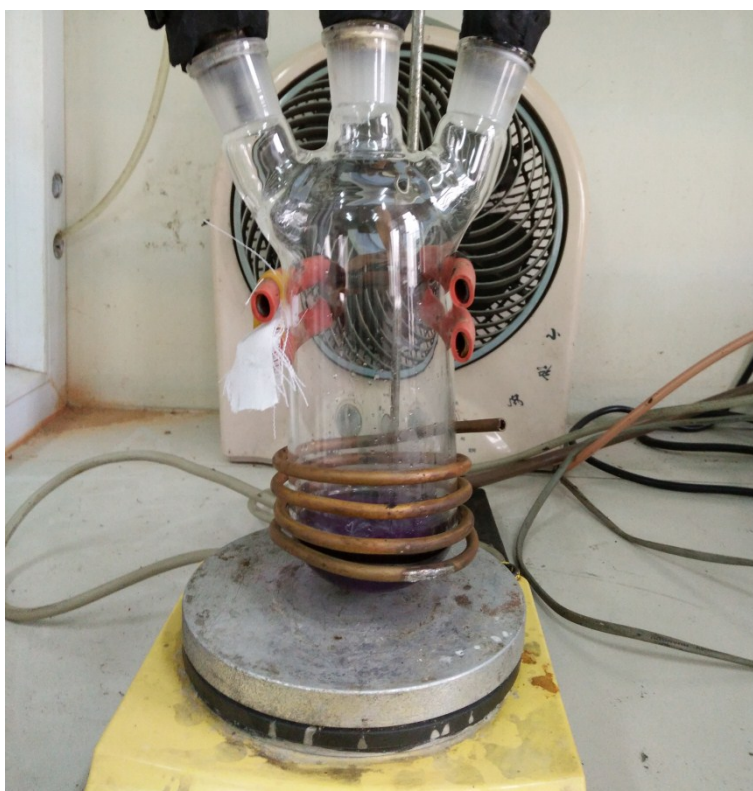

**Fig. S3** Specific experimental setup for the synthesis of CNBs.

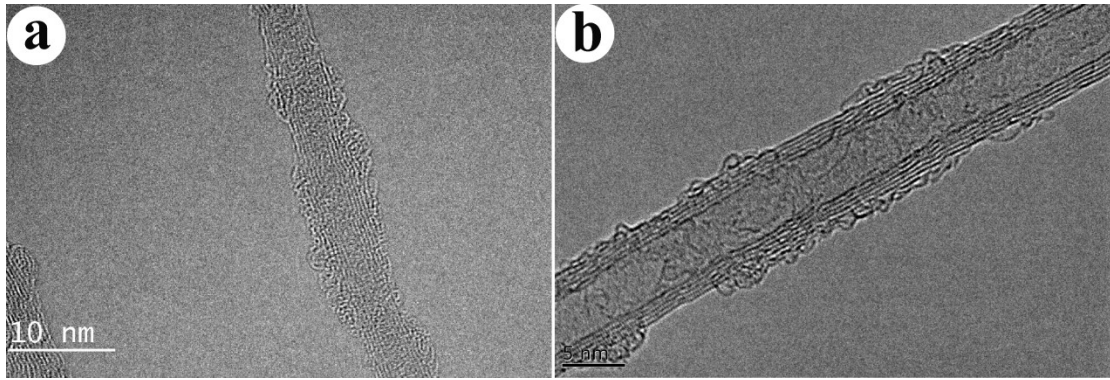

**Fig. S4** (a) and (b): HRTEM images of CNBs obtained for 30 min and 120 min, respectively.

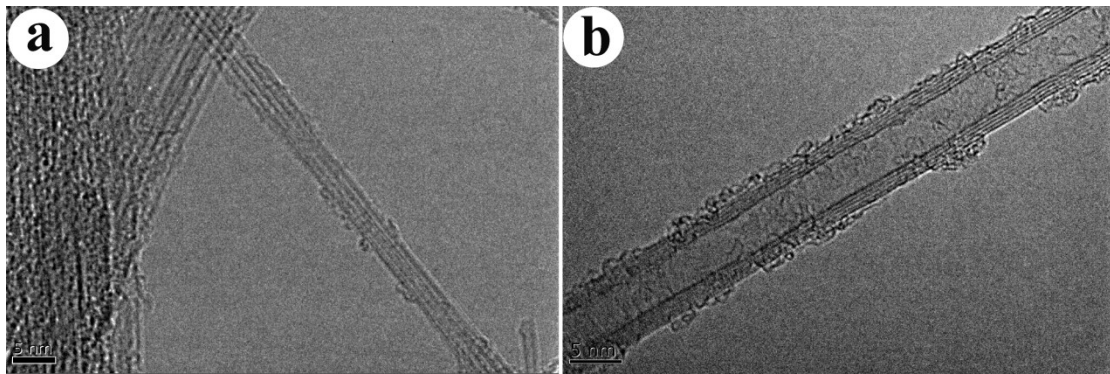

**Fig. S5** (a) and (b): HRTEM images of CNBs obtained with  $C_{60}$  : CNTs ratios of 0.5 and 2, respectively.

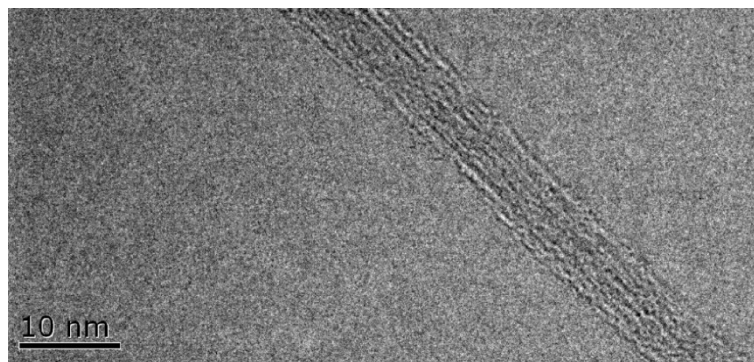

**Fig. S6** TEM image of CNTs after plasma treatment.

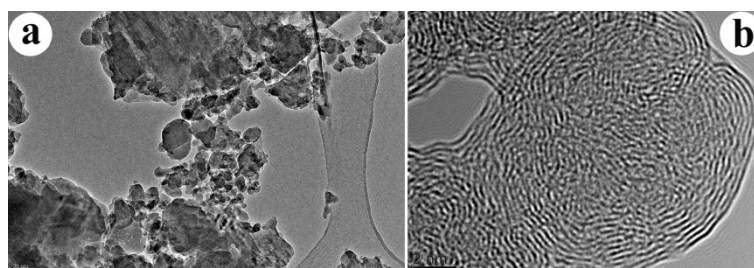

Fig. S7 TEM (a) and HRTEM (b) images of C<sub>60</sub> fullerenes after plasma treatment.

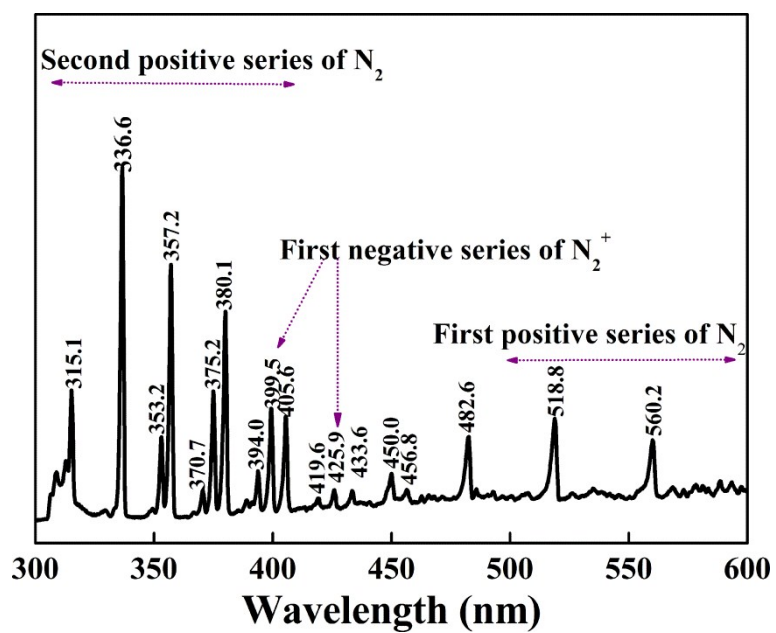

Fig. S8 The OES (optical emission spectroscopy) of N<sub>2</sub> plasma.
